# Supplementary material for: Efficient photoluminescent complexes of 400–1800 nm wavelength emitting lanthanides containing organic sensitizers for optoelectronic devices
Source: Royal Society of Chemistry journal article supplement (doi:10.1039/c4ra11330f), 2014-11-13
Supplement: c4ra11330f1.pdf [file c4ra11330f1.pdf]

## Supplementary information

### Efficient Photoluminescent Complexes from Visible and NIR Emitting Lanthanide containing Organic Sensitizers for Optoelectronic Devices

Zubair Ahmed and K. Iftikhar\*

Department of Chemistry

Jamia Millia Islamia, New Delhi-110 025 (INDIA)

Email: [kiftikhar@jmi.ac.in](mailto:kiftikhar@jmi.ac.in)

Phone: +91-11-26837297, Fax: +91-11-26980229/26982489

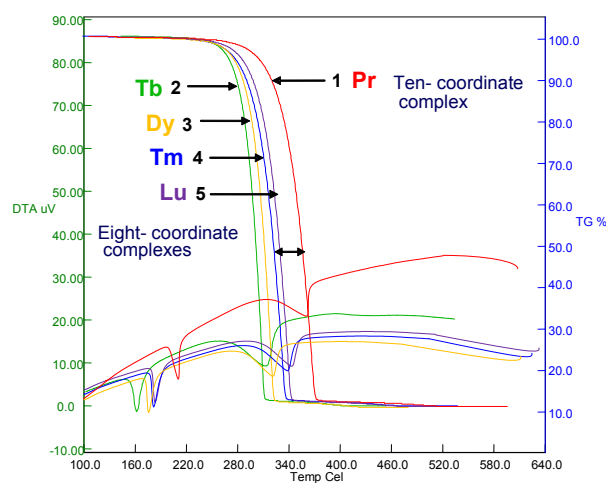

**Fig.S1.** TG/DAT plots of (1)[Pr(hfaa)<sub>3</sub>(bpy)<sub>2</sub>], (2) [Tb(hfaa)<sub>3</sub>(bpy)<sub>2</sub>], (3)[Dy(hfaa)<sub>3</sub>(bpy)], (4) [Tm(hfaa)<sub>3</sub>(bpy)] and (5)[Lu(hfaa)<sub>3</sub>(bpy)]

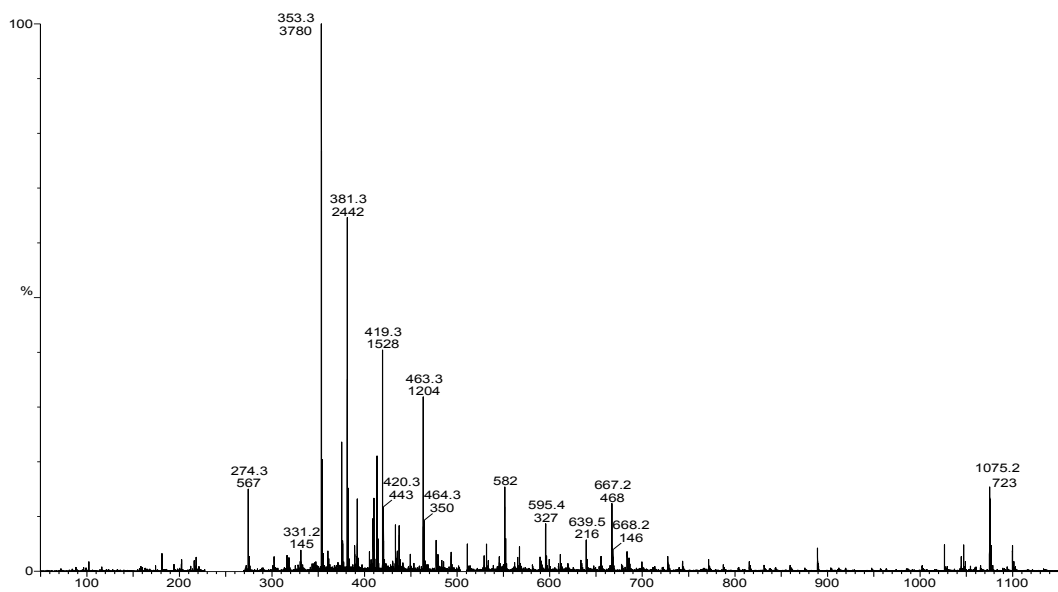

**Fig. S2.** Electrospray mass (ESI-MS<sup>+</sup>) spectrum of [Pr(hfaa)<sub>3</sub>(bpy)<sub>2</sub>] in chloroform.

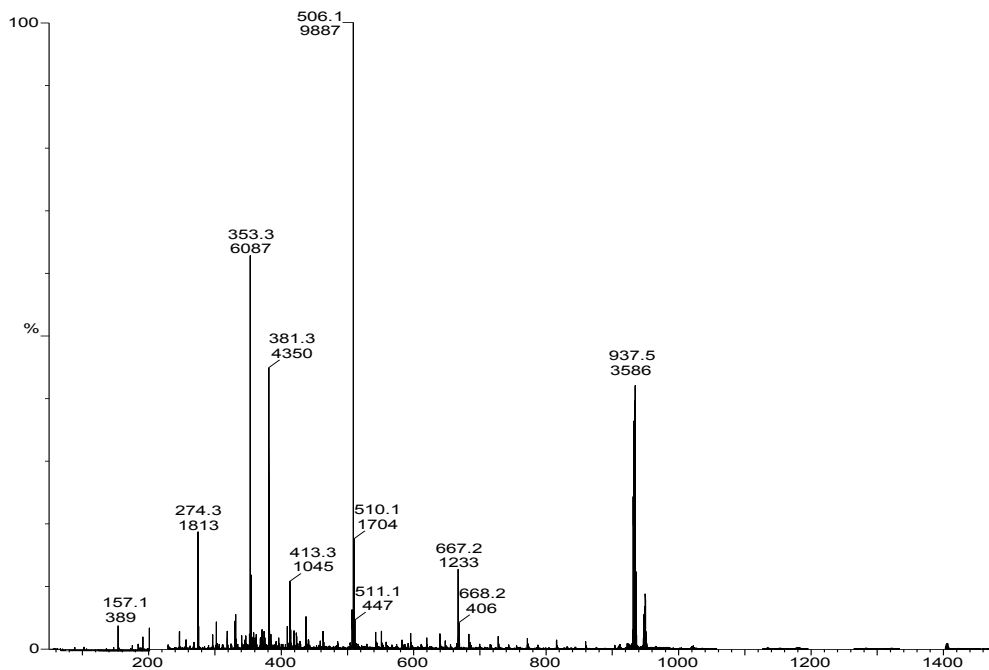

**Fig. S3.** Electrospray mass (ESI-MS<sup>+</sup>) spectrum of [Tb(hfaa)<sub>3</sub>(bpy)] in chloroform.

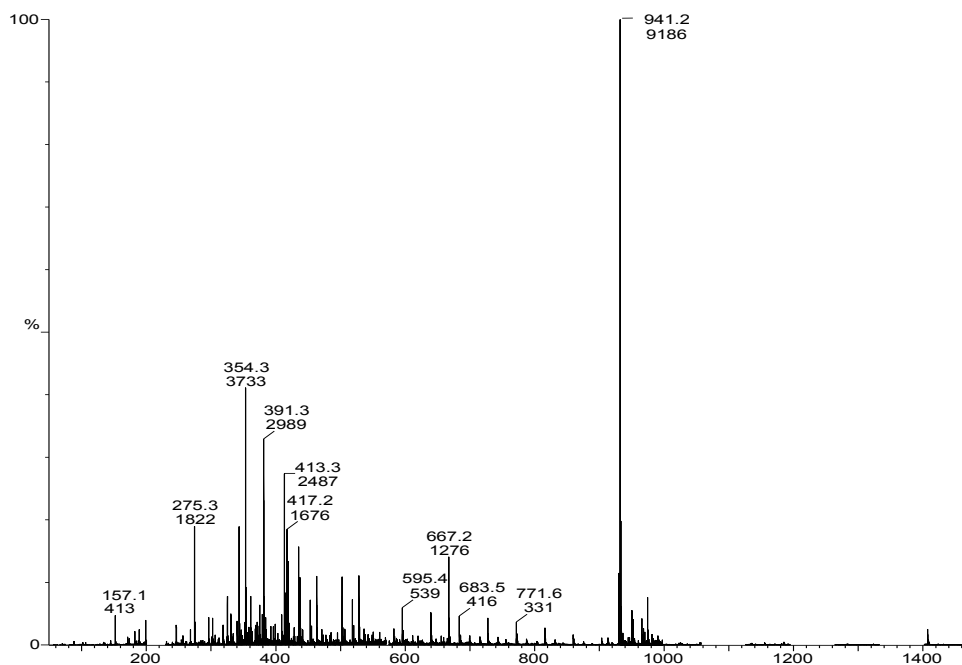

**Fig. S4.** Electrospray mass (ESI-MS<sup>+</sup>) spectrum of [Dy(hfaa)<sub>3</sub>(bpy)] in chloroform.

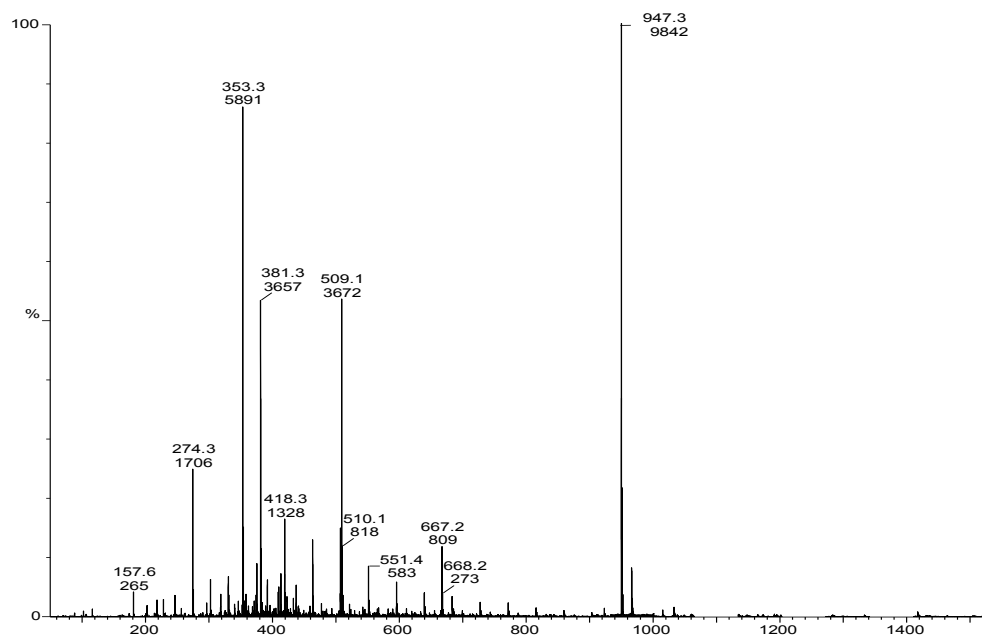

**Fig. S5.** Electrospray mass (ESI-MS<sup>+</sup>) spectrum of [Tm(hfaa)<sub>3</sub>(bpy)] in chloroform.

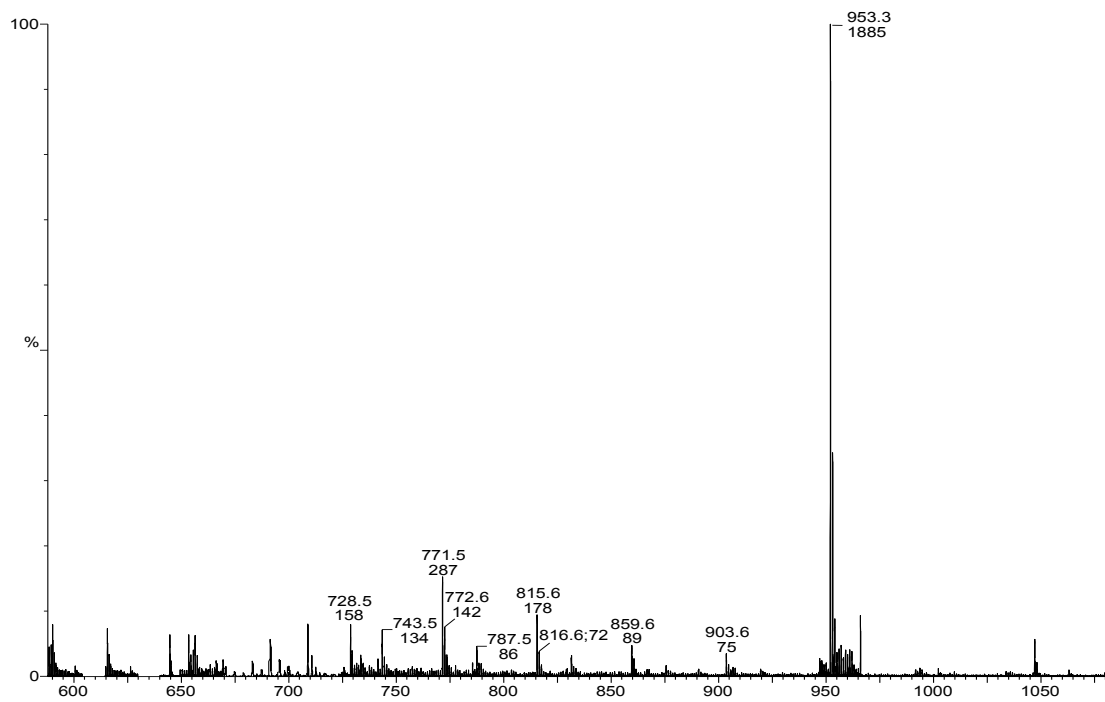

**Fig. S6.** Electrospray mass (ESI-MS<sup>+</sup>) spectrum of [Lu(hfaa)<sub>3</sub>(bpy)] in chloroform.

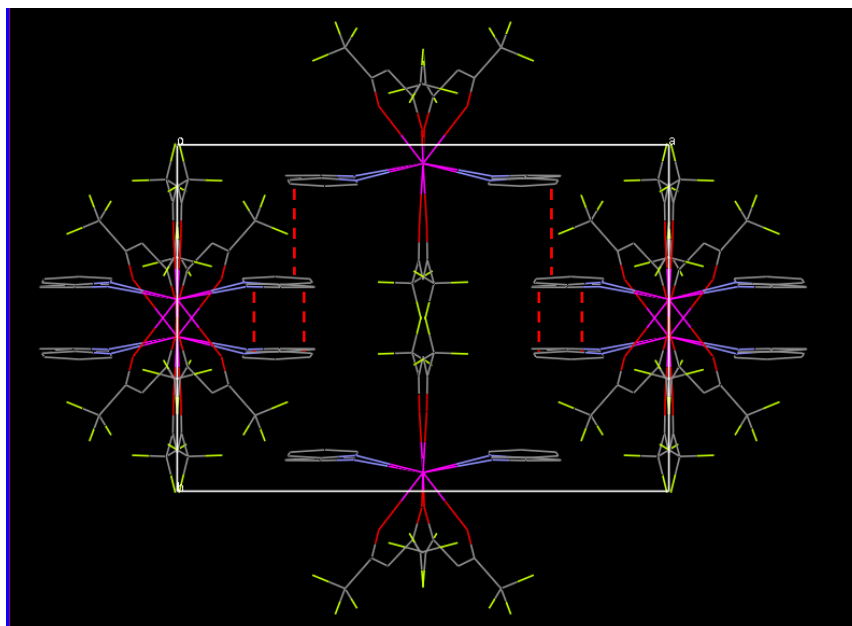

**Fig. S7.** Molecular packing of Pr complex, showing  $\pi$ - $\pi$  stacking between the bpy units.

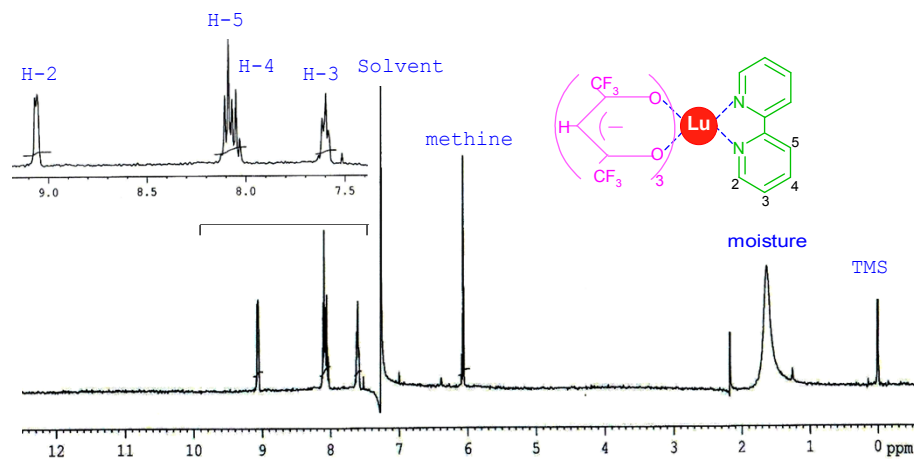

**Fig. S8.**  $^1\text{H}$  NMR spectrum of  $[\text{Lu}(\text{hfaa})_3(\text{bpy})]$  in  $\text{CDCl}_3$ . Inset showing the resolution of region from 7.5 to 9.5 ppm( $\delta$ ).

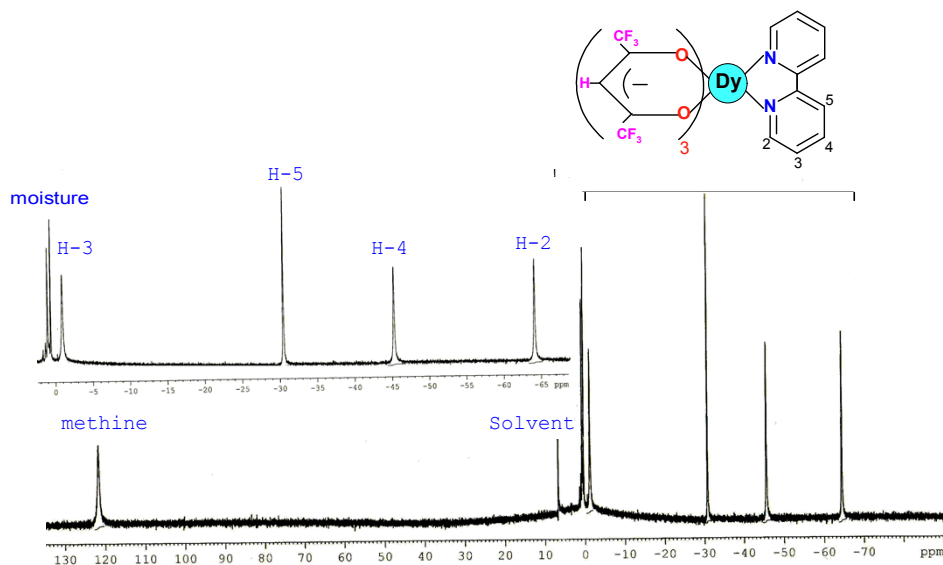

**Fig. 9.**  $^1\text{H}$  NMR spectrum of  $[\text{Dy}(\text{hfaa})_3(\text{bpy})]$  in  $\text{CDCl}_3$ . Inset: resolution of region from  $-65.0$  to  $0.0$  ppm( $\delta$ ).

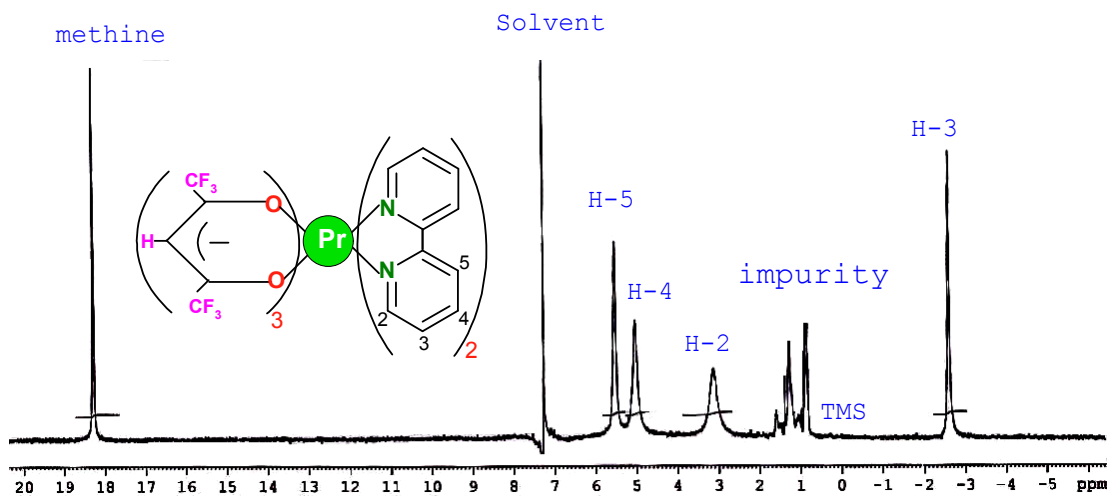

**Fig. S10.** <sup>1</sup>H NMR spectrum of [Pr(hfaa)<sub>3</sub>(bpy)<sub>2</sub>] in CDCl<sub>3</sub>.

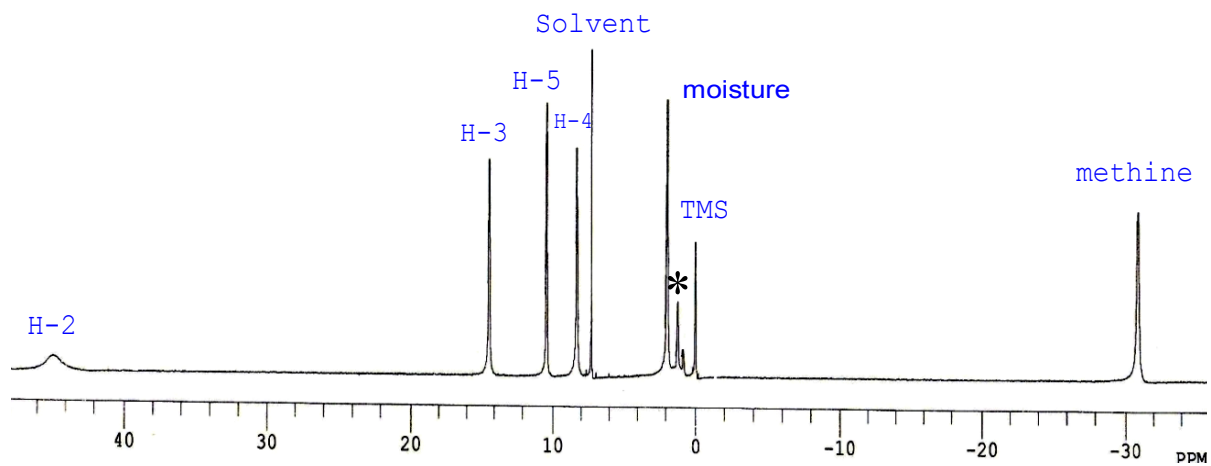

**Fig. S11.** <sup>1</sup>H NMR spectrum of [Tm(hfaa)<sub>3</sub>(bpy)] in CDCl<sub>3</sub>. \*impurity.

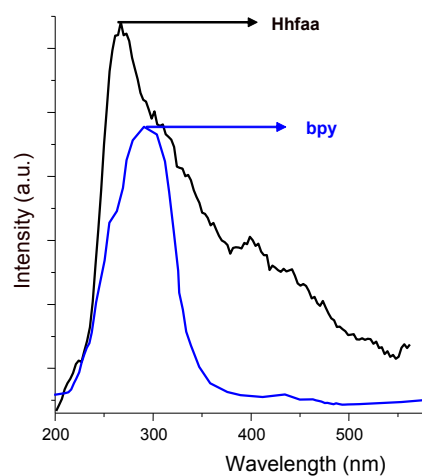

**Fig. S12.** Absorption spectra of Hhfaa and bpy in chloroform. (Concentration =  $5 \times 10^{-5}$  M).

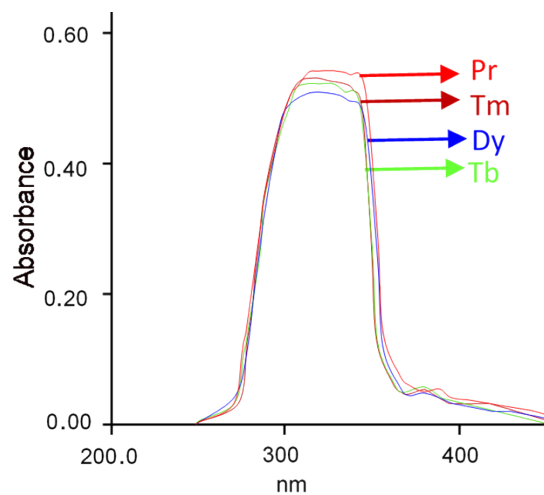

**Fig. S13.** Absorption spectra of  $[\text{Pr}(\text{hfaa})_3(\text{bpy})_2]$  ( $\lambda_{\text{max}} = 321$  nm),  $[\text{Tb}(\text{hfaa})_3(\text{bpy})]$  ( $\lambda_{\text{max}} = 322$  nm),  $[\text{Dy}(\text{hfaa})_3(\text{bpy})_2]$  ( $\lambda_{\text{max}} = 320$  nm) and  $[\text{Tm}(\text{hfaa})_3(\text{bpy})]$  ( $\lambda_{\text{max}} = 318$  nm) in chloroform (Concentration =  $5 \times 10^{-5}$  M).

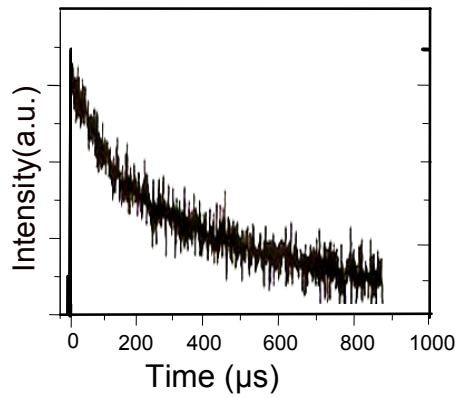

**Fig. S14.** Emission decay curve of the Tb complex at 77 K.

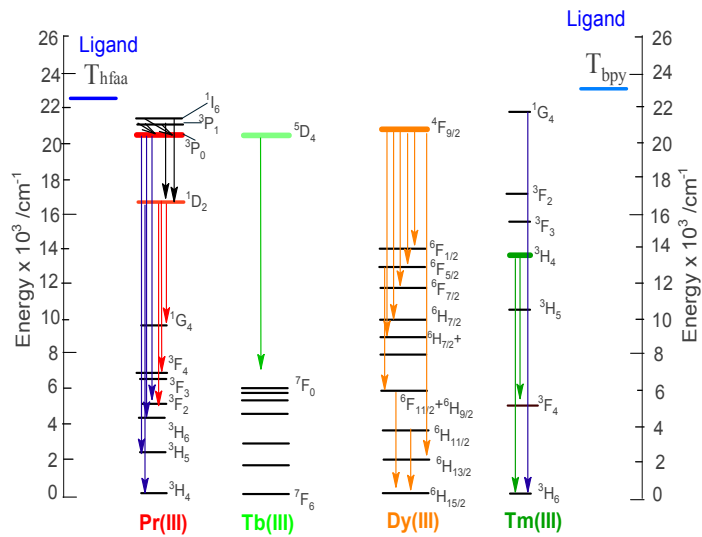

**Fig. S15.** The energy diagram showing lanthanide excited states and their position with respect to the triplet states of hfaa and bpy sensitizers.



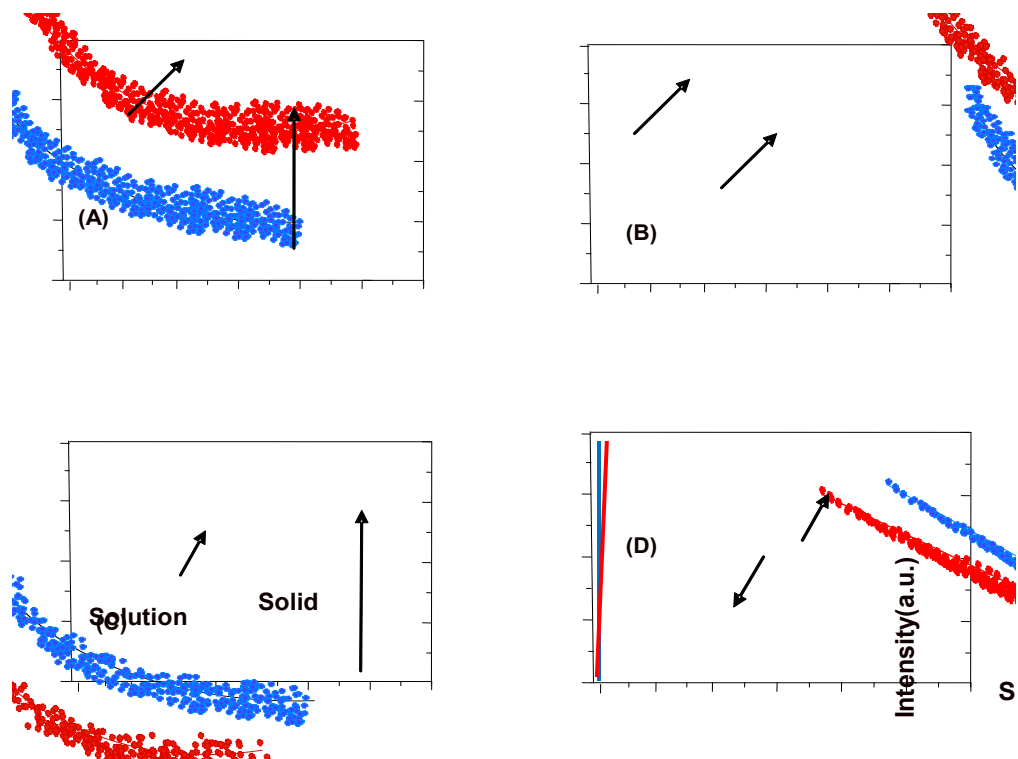

**Fig. S16.** Emission decay curve of the complexes, in visible region, in solution (blue) and solid state (red): Pr (A), Dy (B), Tm (C) and Tb (D).

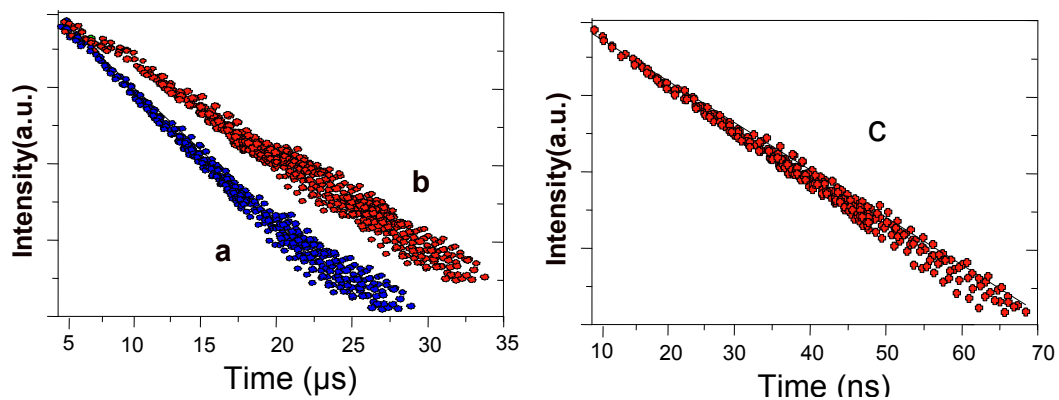

**Fig. S17.** Emission decay curve of the complexes in solution in NIR region: Pr (a), Dy (b) and Tm (c).

**Table S1.** Selected bond angles for the Pr complex.

|                     |            |                     |            |                     |            |
|---------------------|------------|---------------------|------------|---------------------|------------|
| O(2)-Pr(1)-O(2)#1   | 123.13(16) | O(3)-Pr(1)-(1)#1    | 132.17(13) | N(1)#1-Pr(1)-N(2)   | 117.33(14) |
| O(2)-Pr(1)-O(3)     | 68.23(12)  | O(3)#1-Pr(1)-N(1)#1 | 70.46(13)  | N(1)-Pr(1)-N(2)     | 58.22(15)  |
| O(2)#1-Pr(1)-O(3)   | 67.51(12)  | O(1)-Pr(1)-N(1)#1   | 65.66(12)  | O(2)-Pr(1)-N(2)#1   | 71.26(15)  |
| O(2)-Pr(1)-O(3)#1   | 67.51(12)  | O(1)#1-Pr(1)-N(1)#1 | 93.30(13)  | O(2)#1-Pr(1)-N(2)#1 | 118.19(15) |
| O(2)#1-Pr(1)-O(3)#1 | 68.23(12)  | O(2)-Pr(1)-N(1)     | 69.21(14)  | O(3)-Pr(1)-N(2)#1   | 131.73(14) |
| O(3)-Pr(1)-O(3)#1   | 75.41(18)  | O(2)#1-Pr(1)-N(1)   | 123.89(14) | O(3)#1-Pr(1)-N(2)#1 | 65.51(13)  |
| O(2)-Pr(1)-O(1)     | 151.66(12) | O(3)-Pr(1)-N(1)     | 70.46(13)  | O(1)-Pr(1)-N(2)#1   | 99.76(14)  |
| O(2)#1-Pr(1)-O(1)   | 85.02(11)  | O(3)#1-Pr(1)-N(1)   | 132.17(13) | O(1)#1-Pr(1)-N(2)#1 | 64.29(13)  |
| O(3)-Pr(1)-O(1)     | 128.18(12) | O(1)-Pr(1)-N(1)     | 93.30(13)  | N(1)#1-Pr(1)-N(2)#1 | 58.22(15)  |
| O(3)#1-Pr(1)-O(1)   | 134.42(12) | O(1)#1-Pr(1)-N(1)   | 65.66(12)  | N(1)-Pr(1)-N(2)#1   | 117.33(14) |
| O(2)-Pr(1)-O(1)#1   | 85.02(11)  | N(1)#1-Pr(1)-N(1)   | 155.42(19) | N(2)-Pr(1)-N(2)#1   | 161.7(2)   |
| O(2)#1-Pr(1)-O(1)#1 | 151.66(12) | O(2)-Pr(1)-N(2)     | 118.19(15) |                     |            |
| O(3)-Pr(1)-O(1)#1   | 134.42(12) | O(2)#1-Pr(1)-N(2)   | 71.26(15)  |                     |            |
| O(3)#1-Pr(1)-O(1)#1 | 128.18(12) | O(3)-Pr(1)-N(2)     | 65.51(13)  |                     |            |
| O(1)-Pr(1)-O(1)#1   | 67.18(15)  | O(3)#1-Pr(1)-N(2)   | 131.73(14) |                     |            |
| O(2)-Pr(1)-N(1)#1   | 123.89(14) | O(1)-Pr(1)-N(2)     | 64.29(13)  |                     |            |
| O(2)#1-Pr(1)-N(1)#1 | 69.21(14)  | O(1)#1-Pr(1)-N(2)   | 99.76(14)  |                     |            |

**Table S2.** Selected bond angles for the Dy complex.

| Unit 1    |            |           |            | Unit 2      |            |            |            |
|-----------|------------|-----------|------------|-------------|------------|------------|------------|
| O5-Dy1-O6 | 73.00(14)  | O5-Dy1-O1 | 148.73(14) | O10-Dy2-O11 | 75.44(15)  | O10-Dy2-O9 | 75.34(14)  |
| O5-Dy1-O3 | 74.10(14)  | O6-Dy1-O1 | 81.02(15)  | O10-Dy2-O12 | 117.29(15) | O11-Dy2-O9 | 137.27(16) |
| O6-Dy1-O3 | 136.60(14) | O3-Dy1-O1 | 117.01(14) | O11-Dy2-O12 | 72.39(13)  | O12-Dy2-O9 | 149.88(14) |
| O5-Dy1-O4 | 81.33(15)  | O3-Dy1-O1 | 75.61(14)  | O10-Dy2-O7  | 137.26(14) | O7-Dy2-O9  | 72.77(13)  |
| O6-Dy1-O4 | 75.85(15)  | O2-Dy1-O1 | 71.31(14)  | O11-Dy2-O7  | 146.00(14) | O8-Dy2-O9  | 79.47(15)  |
| O3-Dy1-O4 | 71.88(14)  | O5-Dy1-N2 | 75.67(16)  | O12-Dy2-O7  | 81.26(15)  | O10-Dy2-N4 | 143.75(15) |
| O5-Dy1-O2 | 138.92(16) | O6-Dy1-N2 | 114.57(16) | O10-Dy2-O8  | 72.45(15)  | O11-Dy2-N4 | 79.92(15)  |
| O6-Dy1-O2 | 145.27(15) | O3-Dy1-N2 | 83.23(18)  | O11-Dy2-O8  | 119.61(15) | O12-Dy2-N4 | 78.86(15)  |
| O3-Dy1-O2 | 76.35(14)  | O4-Dy1-N2 | 149.90(16) | O12-Dy2-O8  | 79.05(14)  | O7-Dy2-N4  | 74.11(14)  |
| O4-Dy1-O2 | 115.43(15) | O2-Dy1-N2 | 73.06(15)  | O7-Dy2-O8   | 74.36(15)  | O8-Dy2-N4  | 143.72(15) |
| O1-Dy1-N2 | 132.40(15) | O2-Dy1-N1 | 79.20(15)  | O9-Dy2-N4   | 107.54(15) | O8-Dy2-N3  | 147.96(15) |
| O5-Dy1-N1 | 109.82(16) | O1-Dy1-N1 | 79.12(16)  | O10-Dy2-N3  | 82.54(18)  | O9-Dy2-N3  | 74.99(15)  |
| O6-Dy1-N1 | 75.23(15)  | N2-Dy1-N1 | 63.95(17)  | O11-Dy2-N3  | 70.89(15)  | N4-Dy2-N3  | 64.33(15)  |
| O3-Dy1-N1 | 143.59(15) |           |            | O12-Dy2-N3  | 131.39(15) |            |            |
| O4-Dy1-N1 | 144.01(16) |           |            | O7-Dy2-N3   | 115.01(16) |            |            |

**Table. S3.** Chemical shifts<sup>a</sup> and paramagnetic shifts ( $\Delta\delta$ )<sup>b</sup> of the complexes.

| Compound                                             | H(2)                    | H(3)                  | H(4)                  | H(5)                  | CH                 |
|------------------------------------------------------|-------------------------|-----------------------|-----------------------|-----------------------|--------------------|
| Bpy                                                  | 8.70                    | 7.22                  | 7.80                  | 8.53                  | ----               |
| [Pr(hfaa) <sub>3</sub> (bpy) <sub>2</sub> ] <b>1</b> | 3.12(s)<br>(-5.95)      | -2.63(s)<br>(-10.23)  | 5.02(s)<br>(-2.78)    | 5.52(s)<br>(-2.59)    | 18.27<br>(11.67)   |
| [Tb(hfaa) <sub>3</sub> (bpy)] <b>2</b>               | -238.62(b)<br>(-247.07) | -38.22(s)<br>(-45.82) | -5.08(s)<br>(-13.14)  | 1.96(s)<br>(-6.15)    | 107.05<br>(100.99) |
| [Dy(hfaa) <sub>3</sub> (bpy)] <b>3</b>               | -63.87(s)<br>(-72.94)   | -0.69(s)<br>(-8.29)   | -45.01(s)<br>(-53.07) | -30.22(s)<br>(-38.33) | 122.27<br>(116.21) |
| [Tm(hfaa) <sub>3</sub> (bpy)] <b>4</b>               | 44.90(b)<br>(35.834)    | 14.43(s)<br>(6.83)    | 8.31(s)<br>(0.25)     | 10.42(s)<br>(2.31)    | -30.94<br>(-37.00) |
| [Lu(hfaa) <sub>3</sub> (bpy)] <b>5</b>               | 9.07(d)                 | 7.60(d)               | 8.06(s)               | 8.11(d)               | 6.06               |

<sup>a</sup>Chemical shift are relative to internal Me<sub>4</sub>Si and are expressed in ppm ( $\delta$ ). Positive shifts are downfield and negative shifts are upfield.

<sup>b</sup>The paramagnetic shift is the difference between the chemical shift of the nucleus in the paramagnetic complex and the corresponding shift in the diamagnetic complex.

The Paramagnetic shifts are relative to the diamagnetic lutetium (III) complex.

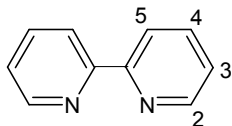**2, 2'-Bipyridine**
